# Supplementary material for: Whole Transcriptome Profiling of the Effects of Cadmium on the Liver of the Xiangxi Yellow Heifer
Source: Front Vet Sci. 2022 Apr 14;9:846662. doi: 10.3389/fvets.2022.846662 (PMC9047687; doi:10.3389/fvets.2022.846662)
Supplement: Supplementary file 1 [file Table_1.docx]

Supplementary Material

# Table S1

Primer sequences for qPCR used in this study

| Gene Name | Primer (5’-3’) | |
| --- | --- | --- |
| actin | F | CCCTGAGCGCAAGTACTCCG |
| R | GACTCATCGTACTCCTGCTTGCT |
| miR-12051 | F | CTCAACTGGTGTCGTGGA |
| R | GCCGAGACTCCTGCAGCATCT |
| RT | CTCAACTGGTGTCGTGGATCGGAAC |
| miR-211 | R | GCCGAGTTCCCTTTGTCATC |
| RT | CTCAACTGGTGTCGTGGAGGCAAAG |
| miR-222 | R | GCCGAGAGCTACATCTGGCTA |
| RT | CTCAACTGGTGTCGTGGAACCCAG |
| miR-11986c | R | GCCGAGGAACTGAGTCCTTTG |
| RT | CTCAACTGGTGTCGTGGATCTTTTC |
| 107132706 | F | ATTAGAGTATCAGCCTTGTCA |
| R | CTGAGCTACTAAGCACCCA |
| 104972497 | F | GAATCCATCAATTCCGCTT |
| R | TACTTGGGCTCTAGGCTAC |
| 790183 | F | CAGGACCTTCCGGTGCCATG |
| R | AACTGTCCCTCTAAGACTGCC |
| 104973640 | F | ATCCTCGATCTGAACTGGTA |
| R | TGGAGGCCCTAGTTACTCA |
| SCD | F | TCCGACCTAAGAGCCGAGA |
| R | CGTTTCATCCCACAGATACCAT |
| CACNG4 | F | GTCTTCCCCATCCTGAGCACCA |
| R | CACGATGTTGTTCTTGCGGCTGT |
| CYP7A1 | F | CAAGTCACTCCTCGCAGTC |
| R | TTGACCAGCATTCTCTAGTGT |
| IGF1 | F | CCATCACATCCTCCTCGCATC |
| R | TGAAATAAAAGCCCCTGTCTCCG |
| CXCL3 | F | ACATACAGAGCGTGAAGGTGAC |
| R | AGGGTTGAGACAAGCTTCCT |
| LIPG | F | GGCTCACCAGCTTTACGTAG |
| R | TAGCCAATCAAGTGAACATTCCC |
| ATP12A | F | TCATGTCCAGTTTCCGCAAG |
| R | CCTTTAATCTCCACTATGTCCCC |
| APOA4 | F | GGGAAGTGAGCACCTACACGGAC |
| R | CCAGCTCCTTCCGAATCTCCT |
| BMP8A | F | GGACTCCTGCATGAACGCCACCA |
| R | CAGCACGCCTTGGGGACCG |
| BMP8B | F | CTCCTTCCCGCTGGACTCCT |
| R | GTAGAGCACGGAAGTGGCGCTCA |
